# Supplementary material
Source: bioRxiv or medRxiv preprint supplement (https://www.biorxiv.org/highwire/filestream/28069/field_highwire_adjunct_files/2/099168-3.pdf)
Supplement: Supplementary file [file 099168-3.pdf]

**Supplementary Table 4**

RNAseq data used for AED analysis

|                                        | <b>Source/SRA Sample</b>  | <b>Reference</b>            |
|----------------------------------------|---------------------------|-----------------------------|
| Adult                                  | ftp://ftp.citrusgreening. | Resse et al., 2013          |
| Egg                                    | ftp://ftp.citrusgreening. | Resse et al., 2013          |
| Nymph                                  | ftp://ftp.citrusgreening. | Resse et al., 2013          |
| Candidatus Liberibacter-free adult     | SAMN02716929              | Vyas et al., 2015           |
| Candidatus Liberibacter-free nymph     | SAMN02716930              | Vyas et al., 2015           |
| Candidatus Liberibacter-infected adult | SAMN02716931              | Vyas et al., 2015           |
| Candidatus Liberibacter-infected nymph | SAMN02716932              | Vyas et al., 2015           |
|                                        |                           |                             |
| female terminal abdomen                | SAMN04159742              | Wu et al., 2016             |
| male terminal abdomen                  | SAMN04159740              | Wu et al., 2016             |
| female antennal                        | SAMN04159737              | Wu et al., 2016             |
| male antennal                          | SAMN04159735              | Wu et al., 2016             |
|                                        |                           |                             |
| Candidatus Liberibacter-free Gut       | NA                        | From personal communication |
| Candidatus Liberibacter-infected Gut   | NA                        | From personal communication |
